# Supplementary material for: Serum Magnesium and Cardiovascular Outcomes and Mortality in CKD: The Chronic Renal Insufficiency Cohort (CRIC)
Source: PubMed Central journal article supplement — Kidney Med. 2021 Jan 12;3(2):183–192.e1. doi: 10.1016/j.xkme.2020.10.010 (PMC8039411; doi:10.1016/j.xkme.2020.10.010), 2021-01-12
Supplement: mmc1.pdf [file mmc1.pdf]

**Figure S1. Magnesium distribution at study baseline**

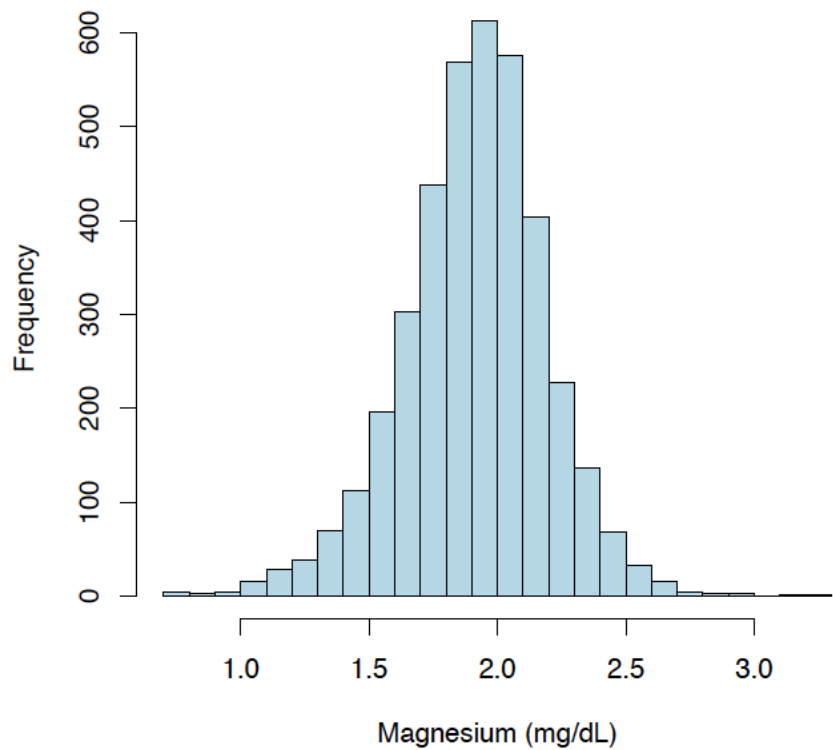

**Table S1. Selected baseline characteristics of participants with missing magnesium levels**

| <b>Characteristic</b> | <b>Patients with missing magnesium level</b> | <b>Patients with available magnesium level</b> |
|-----------------------|----------------------------------------------|------------------------------------------------|
| Age, years (SD)       | 63.9 (8.5)                                   | 58 (11)                                        |
| Women, n (%)          | 660 (41)                                     | 1738 (45)                                      |
| Race, n (%)           |                                              |                                                |
| Non Hispanic White    | 666 (41)                                     | 1610 (42)                                      |
| Non Hispanic Black    | 807 (49)                                     | 1615 (42)                                      |
| Hispanic              | 112 (7)                                      | 491 (13)                                       |
| Other                 | 47 (3)                                       | 151 (4)                                        |
| Hypertension, n (%)   | 1,430 (88)                                   | 3,325 (86)                                     |
| Diabetes n, (%)       | 941 (58)                                     | 1,875 (48.5)                                   |
